# Supplementary material for: Can photoluminescence quenching be a predictor for perovskite solar cell efficiencies?
Source: Royal Society of Chemistry journal article supplement (doi:10.1039/d3cp02190d), 2023-01-01
Supplement: d3cp02190d1.pdf [file d3cp02190d1.pdf]

## Supporting information

### Can photoluminescence be a predictor for perovskite solar cell efficiencies?

Xinjian Geng,<sup>a</sup> Yawen Liu,<sup>a</sup> Xianshao Zou,<sup>a</sup> Erik M. J. Johansson,<sup>a</sup> Jacinto Sá,<sup>a,b\*</sup>

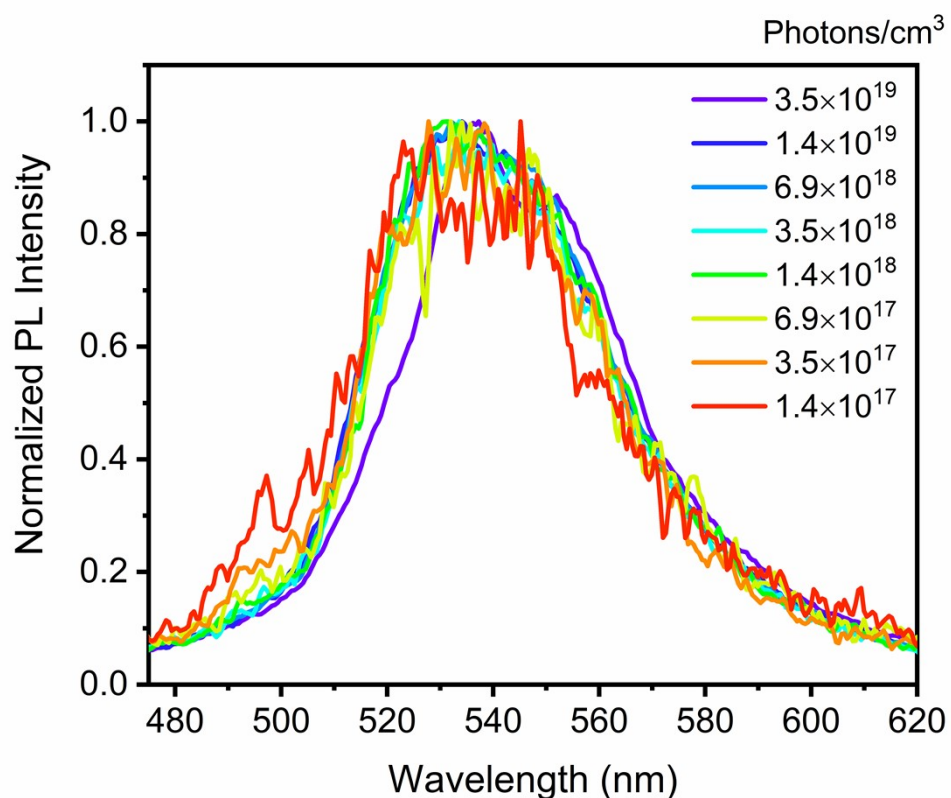

**Figure S1.** FAPbBr<sub>3</sub> PL spectra over different fluencies, confirming system stability at least for the duration of the experiment.
